# Supplementary material for: A molecular convergence in the triad of Parkinson's disease, depressive disorder and gut health is revealed by the inflammation-miRNA axis
Source: Research Square preprint supplement (doi:10.21203/rs.3.rs-7771648/v1), 2025-10-08
Supplement: Supplementary file 1 [file 41ea0eadaa5aa0e545c0ca82.xlsx]

## Sheet: Figure 1
	Procedure	Measurement	Group	Mean	SEM	N = samples	Statistical test	Comparison	Values	Dunnett's multiple comparisons tests	P value of the post hoc
Panel A	RT-qPCR	miR-199a-5p	dlPFC
			Ct	100.0	13.54	9	Welch's ANOVA test	Group	W(DFn, DFd)=7.280 (2.000, 14.68), P=0.0064	Control vs. B2-3	0.0067
			B2-3	44.49	5.32	9				Control vs. B5-6	0.0074
			B5-6	46.41	4.60	9
Panel B	RT-qPCR	miR-219a-5p	dlPFC
			Ct	100.0	7.61	9	Kruskal-Wallis ANOVA test	Group	Kruskal-Wallis statistic=11.62, P=0.0030	Control vs. B2-3	0.0706
			B2-3	68.27	9.15	10				Control vs. B5-6	0.0014
			B5-6	47.15	7.58	9
Panel C	RT-qPCR	miR-200a-3p	dlPFC
			Ct	100.0	10.80	9	Ordinary one-way ANOVA	Group	F(2,26)=7.039, P=0.0036	Control vs. B2-3	0.0021
			B2-3	177.9	17.57	10				Control vs. B5-6	0.0284
			B5-6	155.0	14.62	10
	Procedure	Measurement	Group	Mean	SEM	N = samples	Statistical test	Comparison	Values	Dunnett's multiple comparisons tests	P value of the post hoc
Panel D	RT-qPCR	miR-199a-5p	CAU
			Ct	100.0	13.72	10	Ordinary one-way ANOVA	Group	F(2,27)=7.601, P=0.0024	Control vs. B2-3	0.0041
			B2-3	57.29	5.34	10				Control vs. B5-6	0.0045
			B5-6	57.83	4.48	10
Panel E	RT-qPCR	miR-219a-5p	CAU
			Ct	100.0	14.99	9	Ordinary one-way ANOVA	Group	F(2,25)=7.759, P=0.0024	Control vs. B2-3	0.0046
			B2-3	52.95	6.90	9				Control vs. B5-6	0.0023
			B5-6	46.01	8.21	10
Panel F	RT-qPCR	miR-200a-3p	CAU
			Ct	100.0	11.63	9	Welch's ANOVA test	Group	W(DFn, DFd)=8.619 (2.000, 15.99), P=0.0029	Control vs. B2-3	0.0033
			B2-3	188.9	19.78	10				Control vs. B5-6	0.0560
			B5-6	170.8	26.08	10
	Procedure	Measurement	Group	Mean	SEM	N = samples	Statistical test	Comparison	Values
Panel G	RT-qPCR	miR-199a-5p	dlPFC
			Ct	100.0	8.18	28	Wilcoxon matched-pairs signed rank test	Group	P=0.0003, two-tailed
			DD	67.20	3.82	28
Panel H	RT-qPCR	miR-219a-5p	dlPFC
			Ct	100.0	8.00	28	Paired t-test	Group	t=3.267, df=27, P=0.0030, two-tailed
			DD	71.65	5.24	28
Panel I	RT-qPCR	miR-200a-3p	dlPFC
			Ct	100.0	11.16	28	Wilcoxon matched-pairs signed rank test	Group	P=0.0034, two-tailed
			DD	162.4	20.12	28
	Procedure	Measurement	Group	Mean	SEM	N = samples	Statistical test	Comparison	Values
Panel J	RT-qPCR	miR-199a-5p	CAU
			Ct	100.0	9.57	26	Paired t-test	Group	t=2.883, df=23, P=0.0084, two-tailed
			DD	64.72	6.18	26
Panel K	RT-qPCR	miR-219a-5p	CAU
			Ct	100.0	10.23	27	Wilcoxon matched-pairs signed rank test	Group	P<0.0001, two-tailed
			DD	61.31	5.35	25
Panel L	RT-qPCR	miR-200a-3p	CAU
			Ct	100.0	10.76	26	Paired t-test	Group	t=3.308, df=23, P=0.0031, two-tailed
			DD	147.8	14.96	26

## Sheet: Figure 2
	Procedure	Measurement	Group	Mean	SEM	N = samples	Statistical test	Comparison	Values	Dunnett's T3 multiple comparisons tests	P value of the post hoc
Panel A	RT-qPCR	TNFα	dlPFC
			Ct	100.0	8.23	10	Ordinary one-way ANOVA	Group	F(2,26)=22.53, P<0.0001	Control vs. B2-3	<0.0001
			B2-3	205.2	8.01	9				Control vs. B5-6	0.0117
			B5-6	145.5	14.76	10
Panel B	RT-qPCR	IFNγ	dlPFC
			Ct	100.0	10.58	10	Welch's ANOVA test	Group	W(DFn, DFd)=7.135 (2.000, 15.24), P=0.0065	Control vs. B2-3	0.0164
			B2-3	185.9	25.12	10				Control vs. B5-6	0.0384
			B5-6	172.1	24.67	10
Panel C	RT-qPCR	IL-2	dlPFC
			Ct	100.0	7.65	10	Kruskal-Wallis ANOVA test	Group	Kruskal-Wallis statistic=8.303, P=0.0157	Control vs. B2-3	0.5385
			B2-3	126.6	14.65	9				Control vs. B5-6	0.0084
			B5-6	167.3	21.28	10
Panel D	RT-qPCR	IL-6	dlPFC
			Ct	100.0	9.85	10	Ordinary one-way ANOVA	Group	F(2,27)=9.892, P=0.0006	Control vs. B2-3	0.3167
			B2-3	131.3	16.99	10				Control vs. B5-6	0.0003
			B5-6	201.3	20.75	10
Panel E	RT-qPCR	NFκB1	dlPFC
			Ct	100.0	10.80	10	Ordinary one-way ANOVA	Group	F(2,27)=3.873, P=0.0332	Control vs. B2-3	0.0426
			B2-3	145.5	15.83	10				Control vs. B5-6	0.0421
			B5-6	145.6	13.02	10
	Procedure	Measurement	Group	Mean	SEM	N = samples	Statistical test	Comparison	Values	Dunnett's T3 multiple comparisons tests	P value of the post hoc
Panel F	RT-qPCR	TNFα	CAU
			Ct	100.0	10.74	10	Welch's ANOVA test	Group	W(DFn, DFd)=9.866 (2.000, 15.27), P=0.0018	Control vs. B2-3	0.0032
			B2-3	245.8	33.65	10				Control vs. B5-6	0.0603
			B5-6	155.2	20.43	10
Panel G	RT-qPCR	IFNγ	CAU
			Ct	100.0	11.91	9	Ordinary one-way ANOVA	Group	F(2,26)=3.398, P=0.0489	Control vs. B2-3	0.1299
			B2-3	143.1	19.38	10				Control vs. B5-6	0.0325
			B5-6	158.7	15.67	10
Panel H	RT-qPCR	IL-2	CAU
			Ct	100.0	7.94	10	Kruskal-Wallis ANOVA test	Group	Kruskal-Wallis statistic=3.770, P=0.1518	Control vs. B2-3	0.2191
			B2-3	134.1	15.42	10				Control vs. B5-6	0.1593
			B5-6	127.6	11.30	10
Panel I	RT-qPCR	IL-6	CAU
			Ct	100.0	8.61	10	Ordinary one-way ANOVA	Group	F(2,27)=1.555, P=0.2296	Control vs. B2-3	0.3345
			B2-3	123.9	14.96	10				Control vs. B5-6	0.1816
			B5-6	130.6	14.20	10
Panel J	RT-qPCR	NFκB1	CAU
			Ct	100.0	13.06	10	Ordinary one-way ANOVA	Group	F(2,26)=4.739, P=0.0176	Control vs. B2-3	0.0695
			B2-3	141.3	12.46	9				Control vs. B5-6	0.0123
			B5-6	161.1	18.75	10
	Procedure	Measurement	Group	Mean	SEM	N = samples	Statistical test	Comparison	Values
Panel K	RT-qPCR	TNFα	dlPFC
			Ct	100.0	10.0	27	Wilcoxon matched-pairs signed rank test	Group	P=0.0025, two-tailed
			DD	165.9	16.55	28
Panel L	RT-qPCR	IFNγ	dlPFC
			Ct	100.0	9.36	27	Wilcoxon matched-pairs signed rank test	Group	P=0.8779, two-tailed
			DD	97.65	7.58	28
Panel M	RT-qPCR	IL-2	dlPFC
			Ct	100.0	6.44	26	Paired t-test	Group	t=1.821, df=24, P=0.0811, two-tailed
			DD	115.7	6.92	27
Panel N	RT-qPCR	IL-6	dlPFC
			Ct	100.0	12.78	24	Wilcoxon matched-pairs signed rank test	Group	P=0.2774, two-tailed
			DD	115.5	12.81	22
Panel O	RT-qPCR	NFκB1	dlPFC
			Ct	100.0	4.34	28	Wilcoxon matched-pairs signed rank test	Group	P<0.0001, two-tailed
			DD	148.7	9.23	27
	Procedure	Measurement	Group	Mean	SEM	N = samples	Statistical test	Comparison	Values
Panel P	RT-qPCR	TNFα	CAU
			Ct	100.0	11.43	26	Wilcoxon matched-pairs signed rank test	Group	P<0.0001, two-tailed
			DD	209.6	20.18	28
Panel Q	RT-qPCR	IFNγ	CAU
			Ct	100.0	7.16	28	Paired t-test	Group	t=3.024, df=27, P=0.0054, two-tailed
			DD	131.9	8.81	28
Panel R	RT-qPCR	IL-2	CAU
			Ct	100.0	9.48	22	Paired t-test	Group	t=1.993, df=21, P=0.0595, two-tailed
			DD	125.2	10.75	26
Panel S	RT-qPCR	IL-6	CAU
			Ct	23	100.0	7.30	Wilcoxon matched-pairs signed rank test	Group	P=0.2726, two-tailed
			DD	28	114.8	6.24
Panel T	RT-qPCR	NFκB1	CAU
			Ct	100.0	8.50	28	Paired t-test	Group	t=4.572, df=26, P=0.0001, two-tailed
			DD	165.7	11.11	27

## Sheet: Figure 3
	Procedure	Measurement	Group	Mean	SEM	N = samples	Statistical test	Comparison	Values	Dunnett's T3 multiple comparisons tests	P value of the post hoc
Panel A	RT-qPCR	Iba1	dlPFC
			Ct	100.0	10.80	10	Ordinary one-way ANOVA	Group	F(2,27)=4.744, P=0.0172	Control vs. B2-3	0.0480
			B2-3	145.5	15.83	10				Control vs. B5-6	0.0139
			B5-6	156.1	13.95	10
Panel B	RT-qPCR	GFAP	dlPFC
			Ct	100.0	10.30	9	Welch's ANOVA test	Group	W(DFn, DFd)=6.860 (2.000, 14.33), P=0.0081	Control vs. B2-3	0.0596
			B2-3	172.9	27.67	10				Control vs. B5-6	0.0191
			B5-6	206.2	32.49	10
Panel C	RT-qPCR	HTR2A	dlPFC
			Ct	100.0	13.47	10	Ordinary one-way ANOVA	Group	F(2,27)=5.975, P=0.0071	Control vs. B2-3	0.2092
			B2-3	146.2	21.19	10				Control vs. B5-6	0.0035
			B5-6	199.9	25.00	10
	Procedure	Measurement	Group	Mean	SEM	N = samples	Statistical test	Comparison	Values	Dunnett's multiple comparisons tests	P value of the post hoc
Panel D	RT-qPCR	Iba1	CAU
			Ct	100.0	13.06	10	Welch's ANOVA test	Group	W(DFn, DFd)=4.258 (2.000, 17.06), P=0.0316	Control vs. B2-3	0.0677
			B2-3	141.3	12.46	9				Control vs. B5-6	0.0324
			B5-6	161.1	18.75	10
Panel E	RT-qPCR	GFAP	CAU
			Ct	100.0	11.91	9	Ordinary one-way ANOVA	Group	F(2,26)=3.398, P=0.0489	Control vs. B2-3	0.1299
			B2-3	143.1	19.38	10				Control vs. B5-6	0.0325
			B5-6	158.7	15.67	10
Panel F	RT-qPCR	HTR2A	CAU
			Ct	100.0	11.23	10	Kruskal-Wallis ANOVA test	Group	Kruskal-Wallis statistic=18.55, P<0.0001	Control vs. B2-3	0.3565
			B2-3	142.9	19.18	10				Control vs. B5-6	<0.0001
			B5-6	305.1	29.35	10
	Procedure	Measurement	Group	Mean	SEM	N = samples	Statistical test	Comparison	Values
Panel G	RT-qPCR	Iba1	dlPFC
			Ct	100.0	5.66	27	Wilcoxon matched-pairs signed rank test	Group	P=0.0007, two-tailed
			DD	195.5	19.29	28
Panel H	RT-qPCR	GFAP	dlPFC
			Ct	100.0	4.76	27	Wilcoxon matched-pairs signed rank test	Group	P=0.0187, two-tailed
			DD	80.18	6.18	28
Panel I	RT-qPCR	HTR2A	dlPFC
			Ct	100.0	8.42	28	Wilcoxon matched-pairs signed rank test	Group	P<0.0001, two-tailed
			DD	160.6	10.44	28
	Procedure	Measurement	Group	Mean	SEM	N = samples	Statistical test	Comparison	Values
Panel J	RT-qPCR	Iba1	CAU
			Ct	100.0	7.09	27	Wilcoxon matched-pairs signed rank test	Group	P=0.0015, two-tailed
			DD	156.7	15.04	28
Panel K	RT-qPCR	GFAP	CAU
			Ct	100.0	9.47	27	Wilcoxon matched-pairs signed rank test	Group	P=0.2687, two-tailed
			DD	82.92	5.31	27
Panel L	RT-qPCR	HTR2A	CAU
			Ct	100.0	9.41	28	Paired t-test	Group	t=4.193, df=27, P=0.0003, two-tailed
			DD	168.8	13.30	28

## Sheet: Figure 4
	Procedure	Measurement	Group	Mean	SEM	N = samples	Statistical test	Comparison	Values	Dunnett's T3 multiple comparisons tests	P value of the post hoc
Panel E	Inmunofluorescence	Nº Iba1+ cells	DR
			AAV-EV	212.1	11.96	6	Ordinary one-way ANOVA	Group	F(2,15)=70.70, P<0.0001	AAV-EV vs. AAV-α-Syn 4W	<0.0001
			AAV-α-Syn 4W	506.2	20.74	6				AAV-EV vs. AAV-α-Syn 8W	0.0004
			AAV-α-Syn 8W	338.0	18.73	6				AAV-α-Syn 4W vs. AAV-α-Syn 8W	<0.0001
	Inmunofluorescence	Mean Iba1+ area	DR
			AAV-EV	95.52	3.19	5	Ordinary one-way ANOVA	Group	F(2,14)=25.08, P<0.0001	AAV-EV vs. AAV-α-Syn 4W	<0.0001
			AAV-α-Syn 4W	242.3	21.85	6				AAV-EV vs. AAV-α-Syn 8W	0.0085
			AAV-α-Syn 8W	159.5	8.46	6				AAV-α-Syn 4W vs. AAV-α-Syn 8W	0.0019
Panel F	Inmunofluorescence	Nº GFAP+ cells	DR
			AAV-EV	147.4	7.05	6	Ordinary one-way ANOVA	Group	F(2,15)=59.47, P<0.0001	AAV-EV vs. AAV-α-Syn 4W	<0.0001
			AAV-α-Syn 4W	387.5	19.71	6				AAV-EV vs. AAV-α-Syn 8W	0.0005
			AAV-α-Syn 8W	255.6	17.06	6				AAV-α-Syn 4W vs. AAV-α-Syn 8W	<0.0001
	Procedure	Measurement	Group	Mean	SEM	N = samples	Statistical test	Comparison	Values	Dunnett's T3 multiple comparisons tests	P value of the post hoc
Panel G	Inmunofluorescence	Nº Iba1+ cells	mPFC
			AAV-EV	240.3	14.68	6	Ordinary one-way ANOVA	Group	F(2,15)=38.16, P<0.0001	AAV-EV vs. AAV-α-Syn 4W	<0.0001
			AAV-α-Syn 4W	423.4	10.83	6				AAV-EV vs. AAV-α-Syn 8W	0.0023
			AAV-α-Syn 8W	327.3	18.09	6				AAV-α-Syn 4W vs. AAV-α-Syn 8W	0.0010
	Inmunofluorescence	Mean Iba1+ area	mPFC
			AAV-EV	111.8	1.38	5	Ordinary one-way ANOVA	Group	F(2,13)=75.62, P<0.0001	AAV-EV vs. AAV-α-Syn 4W	<0.0001
			AAV-α-Syn 4W	221.6	8.07	6				AAV-EV vs. AAV-α-Syn 8W	0.0048
			AAV-α-Syn 8W	144.7	7.24	5				AAV-α-Syn 4W vs. AAV-α-Syn 8W	<0.0001
	Inmunofluorescence	Nº Iba1+ cells	CPu
			AAV-EV	307.8	18.23	6	Ordinary one-way ANOVA	Group	F(2,15)=7.354, P=0.0059	AAV-EV vs. AAV-α-Syn 4W	0.0125
			AAV-α-Syn 4W	382.5	13.73	6				AAV-EV vs. AAV-α-Syn 8W	0.9995
			AAV-α-Syn 8W	307.1	15.67	6				AAV-α-Syn 4W vs. AAV-α-Syn 8W	0.0118
	Inmunofluorescence	Mean Iba1+ area	CPu
			AAV-EV	101.4	4.34	6	Kruskal-Wallis test	Group	Kruskal-Wallis statistic=0.9825	AAV-EV vs. AAV-α-Syn 4W	>0.9999
			AAV-α-Syn 4W	105.8	1.33	6				AAV-EV vs. AAV-α-Syn 8W	>0.9999
			AAV-α-Syn 8W	100.1	6.57	6				AAV-α-Syn 4W vs. AAV-α-Syn 8W	0.9912
	Procedure	Measurement	Group	Mean	SEM	N = samples	Statistical test	Comparison	Values	Dunnett's T3 multiple comparisons tests	P value of the post hoc
Panel H	Inmunofluorescence	Nº GFAP+ cells	mPFC
			AAV-EV	131.0	6.50	6	Kruskal-Wallis test	Group	Kruskal-Wallis statistic=12.74, P<0.0001	AAV-EV vs. AAV-α-Syn 4W	0.0011
			AAV-α-Syn 4W	182.4	7.96	6				AAV-EV vs. AAV-α-Syn 8W	0.2231
			AAV-α-Syn 8W	153.0	5.98	6				AAV-α-Syn 4W vs. AAV-α-Syn 8W	0.2231
	Inmunofluorescence	Nº GFAP+ cells	CPu
			AAV-EV	103.0	14.05	6	Kruskal-Wallis test	Group	Kruskal-Wallis statistic=1.979, P=0.3910	AAV-EV vs. AAV-α-Syn 4W	0.7019
			AAV-α-Syn 4W	87.25	11.96	6				AAV-EV vs. AAV-α-Syn 8W	>0.9999
			AAV-α-Syn 8W	97.83	10.05	6				AAV-α-Syn 4W vs. AAV-α-Syn 8W	0.6401
	Procedure	Measurement	Group	Mean	SEM	N = samples	Statistical test	Comparison	Values	Dunnett's T3 multiple comparisons tests	P value of the post hoc
Panel J	Forced Swimming Test	Immobility time (s)
			AAV-EV	166.0	13.37	6	Ordinary one-way ANOVA	Group	F(2,15)=9.400, P=0.0023	AAV-EV vs. AAV-α-Syn 4W	0.0366
			AAV-α-Syn 4W	207.3	4.12	6				AAV-EV vs. AAV-α-Syn 8W	0.0018
			AAV-α-Syn 8W	230.0	11.85	6				AAV-α-Syn 4W vs. AAV-α-Syn 8W	0.3125
Panel K	Tail Suspension Test	Immobility time (s)
			AAV-EV	115.2	6.83	6	Ordinary one-way ANOVA	Group	F(2,15)=7.412, P=0.0058	AAV-EV vs. AAV-α-Syn 4W	0.0245
			AAV-α-Syn 4W	171.7	12.67	6				AAV-EV vs. AAV-α-Syn 8W	0.0069
			AAV-α-Syn 8W	183.8	18.33	6				AAV-α-Syn 4W vs. AAV-α-Syn 8W	0.8011
	Procedure	Measurement	Group	Mean	SEM	N = samples	Statistical test	Comparison	Values
Panel L	Oral gavage administration	Gut transit time
			AAV-EV	199.2	16.08	12	Mann-Whitney test	Group	Mann-Whitney U=34, P=0.0273, two-tailed
			AAV-α-Syn 8W	392.4	82.94	12
Panel M	RT-qPCR	Iba1	Ileum
			AAV-EV	100.0	7.80	7	Unpaired t-test with Welch's correction	Group	t=2.060, df=7.122, P=0.0777, two-tailed
			AAV-α-Syn 8W	154.7	25.40	7
Panel N	RT-qPCR	GFAP	Ileum
			AAV-EV	100.0	16.92	7	Unpaired t-test with Welch's correction	Group	t=3.884, df=11.17, P=0.0025, two-tailed
			AAV-α-Syn 8W	208.9	22.37	7

## Sheet: Figure 5
	Procedure	Measurement	Group	Mean	SEM	N = samples	Statistical test	Comparison	Values
Panel A	RT-qPCR	miR-199a-5p	mPFC
			AAV-EV	100.0	3.84	7	Unpaired t-test	Group	t=3.217, df=12, P=0.0074
			AAV-α-Syn 8W	71.90	7.85	7
Panel B	RT-qPCR	miR-219a-5p	mPFC
			AAV-EV	100.0	6.82	7	Unpaired t-test	Group	t=3.329, df=12, P=0.0060
			AAV-α-Syn 8W	64.72	8.11	7
Panel C	RT-qPCR	miR-200a-3p	mPFC
			AAV-EV	100.0	13.96	7	Unpaired t-test	Group	t=2.991, df=11, P=0.0123
			AAV-α-Syn 8W	158.6	13.46	6
	Procedure	Measurement	Group	Mean	SEM	N = samples	Statistical test	Comparison	Values
Panel D	RT-qPCR	miR-199a-5p	CPu
			AAV-EV	100.0	11.03	7	Unpaired t-test	Group	t=2.398, df=12, P=0.0337
			AAV-α-Syn 8W	66.71	8.43	7
Panel E	RT-qPCR	miR-219a-5p	CPu
			AAV-EV	100.0	9.48	7	Unpaired t-test	Group	t=3.061, df=12, P=0.0099
			AAV-α-Syn 8W	65.75	5.95	7
Panel F	RT-qPCR	miR-200a-3p	CPu
			AAV-EV	100.0	15.68	7	Unpaired t-test	Group	t=2.435, df=12, P=0.0314
			AAV-α-Syn 8W	144.4	9.33	7
	Procedure	Measurement	Group	Mean	SEM	N = samples	Statistical test	Comparison	Values
Panel G	RT-qPCR	miR-199a-5p	Ileum
			AAV-EV	100.0	11.60	7	Unpaired t-test with Welch's correction	Group	t=2.154, df=6.304, P=0.0725
			AAV-α-Syn 8W	74.69	1.85	7
Panel H	RT-qPCR	miR-219a-5p	Ileum
			AAV-EV	100.0	8.24	6	Unpaired t-test	Group	t=3.068, df=11, P=0.0107
			AAV-α-Syn 8W	71.50	4.95	7
Panel I	RT-qPCR	miR-200a-3p	Ileum
			AAV-EV	100.0	8.60	7	Unpaired t-test	Group	t=3.589, df=12, P=0.0037
			AAV-α-Syn 8W	139.2	6.74	7
	Procedure	Measurement	Group	Mean	SEM	N = samples	Statistical test	Comparison	Values
Panel J	RT-qPCR	TNFα	mPFC
			AAV-EV	100.0	8.11	7	Unpaired t-test	Group	t=3.685, df=12, P=0.0031
			AAV-α-Syn 8W	154.0	12.20	7
Panel K	RT-qPCR	IFNγ	mPFC
			AAV-EV	100.0	2.67	7	Unpaired t-test with Welch's correction	Group	t=3.368, df=6.171, P=0.0145
			AAV-α-Syn 8W	176.0	22.40	7
Panel L	RT-qPCR	IL-2	mPFC
			AAV-EV	100.0	19.14	7	Mann-Whitney test	Group	Mann-Whitney U=12, P=0.2343
			AAV-α-Syn 8W	76.05	15.10	6
Panel M	RT-qPCR	IL-6	mPFC
			AAV-EV	100.0	11.77	7	Unpaired t-test	Group	t=0.4383, df=12, P=0.6689
			AAV-α-Syn 8W	93.79	7.87	7
Panel N	RT-qPCR	NFκB1	mPFC
			AAV-EV	100.0	6.81	7	Mann-Whitney test	Group	Mann-Whitney U=0, P=0.0006
			AAV-α-Syn 8W	135.8	6.14	7
	Procedure	Measurement	Group	Mean	SEM	N = samples	Statistical test	Comparison	Values
Panel O	RT-qPCR	TNFα	CPu
			AAV-EV	100.0	7.00	7	Unpaired t-test	Group	t=4.673, df=12, P=0.0005
			AAV-α-Syn 8W	138.6	4.38	7
Panel P	RT-qPCR	IFNγ	CPu
			AAV-EV	100.0	10.51	7	Unpaired t-test	Group	t=1.969, df=12, P=0.0725
			AAV-α-Syn 8W	138.9	16.74	7
Panel Q	RT-qPCR	IL-2	CPu
			AAV-EV	100.0	19.19	7	Unpaired t-test with Welch's correction	Group	t=1.219, df=6.254, P=0.2669
			AAV-α-Syn 8W	76.36	2.80	6
Panel R	RT-qPCR	IL-6	CPu
			AAV-EV	100.0	11.07	7	Unpaired t-test	Group	t=1.153, df=12, P=0.2713
			AAV-α-Syn 8W	114.7	6.38	7
Panel S	RT-qPCR	NFκB1	CPu
			AAV-EV	100.0	12.67	7	Unpaired t-test	Group	t=5.937, df=12, P<0.0001
			AAV-α-Syn 8W	192.1	8.93	7
	Procedure	Measurement	Group	Mean	SEM	N = samples	Statistical test	Comparison	Values
Panel T	RT-qPCR	TNFα	Ileum
			AAV-EV	100.0	4.65	7	Unpaired t-test with Welch's correction	Group	t=4.707, df=6.568, P=0.0026
			AAV-α-Syn 8W	203.0	21.37	7
Panel U	RT-qPCR	IFNγ	Ileum
			AAV-EV	100.0	20.19	7	Unpaired t-test	Group	t=2.479, df=11, P=0.0306
			AAV-α-Syn 8W	191.8	32.48	6
Panel V	RT-qPCR	IL-2	Ileum
			AAV-EV	100.0	20.54	7	Unpaired t-test	Group	t=1.489, df=11, P=0.1646
			AAV-α-Syn 8W	157.1	33.92	6
Panel W	RT-qPCR	IL-6	Ileum
			AAV-EV	100.0	21.21	6	Unpaired t-test	Group	t=2.008, df=11, P=0.0699
			AAV-α-Syn 8W	168	25.48	7
Panel X	RT-qPCR	NFκB1	Ileum
			AAV-EV	100.0	6.89	7	Unpaired t-test with Welch's correction	Group	t=3.277, df=7.263, P=0.0129
			AAV-α-Syn 8W	172.8	21.12	7
	Procedure	Measurement	Group	Mean	SEM	N = samples	Statistical test	Comparison	Values
Panel Y	RT-qPCR	HTR2A	mPFC
			AAV-EV	100.0	7.82	7	Unpaired t-test	Group	t=3.423, df=12, P=0.0050
			AAV-α-Syn 8W	168.9	18.53	7
	RT-qPCR	HTR2A	CPu
			AAV-EV	100.0	5.18	7	Unpaired t-test	Group	t=4.216, df=12, P=0.0012
			AAV-α-Syn 8W	130.4	5.01	7
Panel Z	RT-qPCR	HTR2A	Ileum
			AAV-EV	100.0	14.18	7	Unpaired t-test	Group	t=0.1717, df=12, P=0.8665
			AAV-α-Syn 8W	103.2	12.37	7

## Sheet: Figure 6
	Procedure	Measurement	Group	Mean	SEM	N = samples	Statistical test	Comparison	Values
Panel B	Forced Swimming Test	Immobility time (s)
			VEH	143.6	8.76	12	Unpaired t-test	Group	t=2.673, df=24, P=0.0133
			CORT	174.5	7.64	14
	Tail Suspension Test	Immobility time (s)
			VEH	125.7	6.13	11	Unpaired t-test	Group	t=4.242, df=21, P=0.0004
			CORT	165.0	6.86	12
	Procedure	Measurement	Group	Mean	SEM	N = samples	Statistical test	Comparison	Values
Panel C	RT-qPCR	miR-199a-5p	mPFC
			VEH	100.0	12.58	10	Unpaired t-test	Group	t=2.558, df=19, P=0.0192
			CORT	65.07	6.27	11
Panel D	RT-qPCR	miR-219a-5p	mPFC
			VEH	100.0	8.59	10	Unpaired t-test	Group	t=2.562, df=19, P=0.0191
			CORT	70.17	7.89	11
Panel E	RT-qPCR	miR-200a-3p	mPFC
			VEH	100.0	10.44	10	Mann-Whitney test	Group	Mann-Whitney U=24, P=0.0295
			CORT	148.6	14.37	11
Panel F	RT-qPCR	miR-199a-5p	CPu
			VEH	100.0	9.33	12	Unpaired t-test	Group	t=2.462, df=21, P=0.0225
			CORT	69.35	8.08	11
Panel G	RT-qPCR	miR-219a-5p	CPu
			VEH	100.0	5.86	11	Unpaired t-test	Group	t=2.031, df=20, P=0.0558
			CORT	79.62	8.14	11
Panel H	RT-qPCR	miR-200a-3p	CPu
			VEH	100.0	8.48	12	Unpaired t-test with Welch's correction	Group	t=2.352, df=14.62, P=0.0332
			CORT	145.3	17.30	11
	Procedure	Measurement	Group	Mean	SEM	N = samples	Statistical test	Comparison	Values
Panel I	RT-qPCR	TNFα	mPFC
			VEH	100.0	6.69	10	Unpaired t-test	Group	t=3.006, df=19, P=0.0073
			CORT	139.9	11.08	11
Panel J	RT-qPCR	IFNγ	mPFC
			VEH	100.0	5.74	10	Unpaired t-test with Welch's correction	Group	t=7.709, df=11.35, P<0.0001
			CORT	275.2	21.99	11
Panel K	RT-qPCR	IL-2	mPFC
			VEH	100.0	13.56	10	Mann-Whitney test	Group	Mann-Whitney U=36, P=0.1971
			CORT	76.70	11.38	11
Panel L	RT-qPCR	IL-6	mPFC
			VEH	100.0	5.99	10	Mann-Whitney test	Group	Mann-Whitney U=25, P=0.0357
			CORT	131.2	11.27	11
Panel M	RT-qPCR	NFκB1	mPFC
			VEH	100.0	6.83	10	Mann-Whitney test	Group	Mann-Whitney U=15, P=0.0037
			CORT	136.5	10.09	11
	Procedure	Measurement	Group	Mean	SEM	N = samples	Statistical test	Comparison	Values
Panel N	RT-qPCR	Iba1	mPFC
			VEH	100.0	7.04	10	Unpaired t-test with Welch's correction	Group	t=3.683, df=12.21, P=0.0030
			CORT	181.4	20.94	11
Panel O	RT-qPCR	GFAP	mPFC
			VEH	100.0	5.73	10	Unpaired t-test	Group	t=2.557, df=19, P=0.0193
			CORT	78.90	5.89	11
Panel P	RT-qPCR	HTR2A	mPFC
			VEH	100.0	14.14	10	Unpaired t-test	Group	t=2.335, df=19, P=0.0307
			CORT	156.2	18.97	11
	Procedure	Measurement	Group	Mean	SEM	N = samples	Statistical test	Comparison	Values
Panel Q	RT-qPCR	TNFα	CPu
			VEH	100.0	3.61	12	Mann-Whitney test	Group	Mann-Whitney U=57, P=0.6075
			CORT	102.5	8.52	11
Panel R	RT-qPCR	IFNγ	CPu
			VEH	100.0	15.01	11	Unpaired t-test	Group	t=6.452, df=20, P<0.0001
			CORT	218.4	10.56	11
Panel S	RT-qPCR	IL-2	CPu
			VEH	100.0	9.11	12	Unpaired t-test	Group	t=0.1377, df=20, P=0.8919
			CORT	102.5	16.32	10
Panel T	RT-qPCR	IL-6	CPu
			VEH	100.0	9.16	12	Mann-Whitney test	Group	Mann-Whitney U=34, P=0.0931
			CORT	137.4	13.20	10
Panel U	RT-qPCR	NFκB1	CPu
			VEH	100.0	4.95	12	Unpaired t-test with Welch's correction	Group	t=2.190, df=12.34, P=0.0484
			CORT	127.3	11.42	10
	Procedure	Measurement	Group	Mean	SEM	N = samples	Statistical test	Comparison	Values
Panel V	RT-qPCR	Iba1	CPu
			VEH	100.0	5.48	12	Unpaired t-test	Group	t=2.925, df=21, P=0.0081
			CORT	131.2	9.43	11
Panel W	RT-qPCR	GFAP	CPu
			VEH	100.0	6.06	12	Unpaired t-test	Group	t=2.281, df=19, P=0.0342
			CORT	77.39	8.13	9
Panel X	RT-qPCR	HTR2A	CPu
			VEH	100.0	7.57	12	Unpaired t-test	Group	t=2.555, df=21, P=0.0184
			CORT	128.3	8.08	11

## Sheet: Supp Figure 1
	Procedure	Measurement	Group	Mean	SEM	N = samples	Statistical test	Comparison	Values
Panel A	RT-qPCR	miR-199a-5p	dlPFC Male
			Ct	100.0	8.40	18	Paired t-test	Group	t=3.488, df=17, P=0.0028, two-tailed
			DD	69.13	4.65	19
Panel B	RT-qPCR	miR-219a-5p	dlPFC Male
			Ct	100.0	10.09	19	Paired t-test	Group	t=2.156, df=18, P=0.0449, two-tailed
			DD	74.29	5.81	19
Panel C	RT-qPCR	miR-200a-3p	dlPFC Male
			Ct	100.0	11.47	19	Wilcoxon matched-pairs signed rank test	Group	P=0.0258, two-tailed
			DD	165.8	20.67	19
	Procedure	Measurement	Group	Mean	SEM	N = samples	Statistical test	Comparison	Values
Panel D	RT-qPCR	miR-199a-5p	dlPFC Female
			Ct	100.0	12.37	9	Paired t-test	Group	t=1.867, df=8, P=0.0988, two-tailed
			DD	72.33	3.65	9
Panel E	RT-qPCR	miR-219a-5p	dlPFC Female
			Ct	100.0	11.13	9	Paired t-test	Group	t=2.622, df=8, P=0.0306, two-tailed
			DD	67.64	9.44	9
Panel F	RT-qPCR	miR-200a-3p	dlPFC Female
			Ct	100.0	9.17	9	Paired t-test	Group	t=2.990, df=8, P=0.0173, two-tailed
			DD	146.9	15.26	9
	Procedure	Measurement	Group	Mean	SEM	N = samples	Statistical test	Comparison	Values
Panel G	RT-qPCR	miR-199a-5p	CAU Male
			Ct	100.0	12.06	18	Paired t-test	Group	t=2.027, df=15, P=0.0608, two-tailed
			DD	66.70	8.20	17
Panel H	RT-qPCR	miR-219a-5p	CAU Male
			Ct	100.0	8.40	16	Paired t-test	Group	t=3.238, df=14, P=0.0060, two-tailed
			DD	62.74	5.86	15
Panel I	RT-qPCR	miR-200a-3p	CAU Male
			Ct	100.0	13.77	18	Paired t-test	Group	t=1.466, df=14, P=0.1647, two-tailed
			DD	116.9	11.64	16
	Procedure	Measurement	Group	Mean	SEM	N = samples	Statistical test	Comparison	Values
Panel J	RT-qPCR	miR-199a-5p	CAU Female
			Ct	100.0	13.71	8	Paired t-test	Group	t=2.793, df=7, P=0.0268, two-tailed
			DD	61.70	7.13	9
Panel K	RT-qPCR	miR-219a-5p	CAU Female
			Ct	100.0	11.39	8	Paired t-test	Group	t=2.165, df=7, P=0.0671, two-tailed
			DD	67.54	4.78	9
Panel L	RT-qPCR	miR-200a-3p	CAU Female
			Ct	100.0	15.25	8	Paired t-test	Group	t=3.368, df=7, P=0.0119, two-tailed
			DD	166.0	15.33	9

## Sheet: Supp Figure 2
	Procedure	Measurement	Group	Mean	SEM	N = samples	Statistical test	Comparison	Values
Panel A	RT-qPCR	TNFα	dlPFC Male
			Ct	100.0	14.28	18	Wilcoxon matched-pairs signed rank test	Group	P=0.0304, two-tailed
			DD	171.8	22.33	19
Panel B	RT-qPCR	IFNγ	dlPFC Male
			Ct	100.0	9.30	19	Wilcoxon matched-pairs signed rank test	Group	P=0.8288, two-tailed
			DD	103.6	9.58	19
Panel C	RT-qPCR	IL-2	dlPFC Male
			Ct	100.0	9.21	18	Wilcoxon matched-pairs signed rank test	Group	P=0.0093, two-tailed
			DD	147.0	16.84	18
Panel D	RT-qPCR	IL-6	dlPFC Male
			Ct	100.0	15.48	17	Wilcoxon matched-pairs signed rank test	Group	P=0.4548, two-tailed
			DD	118.9	14.02	14
Panel E	RT-qPCR	NFκB1	dlPFC Male
			Ct	100.0	4.19	18	Wilcoxon matched-pairs signed rank test	Group	P<0.0001, two-tailed
			DD	173.8	17.35	19
	Procedure	Measurement	Group	Mean	SEM	N = samples	Statistical test	Comparison	Values
Panel F	RT-qPCR	TNFα	dlPFC Female
			Ct	100.0	10.35	9	Paired t-test	Group	t=2.583, df=9, P=0.0325, two-tailed
			DD	153.5	21.95	9
Panel G	RT-qPCR	IFNγ	dlPFC Female
			Ct	100.0	12.04	8	Paired t-test	Group	t=0.7587, df=7, P=0.4728, two-tailed
			DD	87.30	8.32	9
Panel H	RT-qPCR	IL-2	dlPFC Female
			Ct	100.0	16.72	8	Paired t-test	Group	t=2.050, df=7, P=0.0795, two-tailed
			DD	166.4	21.87	9
Panel I	RT-qPCR	IL-6	dlPFC Female
			Ct	100.0	13.67	7	Paired t-test	Group	t=1.090, df=7, P=0.3174, two-tailed
			DD	117.8	26.94	8
Panel J	RT-qPCR	NFκB1	dlPFC Female
			Ct	100.0	9.46	9	Wilcoxon matched-pairs signed rank test	Group	P=0.0195, two-tailed
			DD	138.0	8.87	9
	Procedure	Measurement	Group	Mean	SEM	N = samples	Statistical test	Comparison	Values
Panel K	RT-qPCR	TNFα	CAU Male
			Ct	100.0	11.93	17	Wilcoxon matched-pairs signed rank test	Group	P=0.0003, two-tailed
			DD	206.6	19.94	19
Panel L	RT-qPCR	IFNγ	CAU Male
			Ct	100.0	9.89	19	Paired t-test	Group	t=2.422, df=18, P=0.0262, two-tailed
			DD	134.2	10.98	19
Panel M	RT-qPCR	IL-2	CAU Male
			Ct	100.0	9.68	13	Paired t-test	Group	t=2.991, df=12, P=0.0112, two-tailed
			DD	206.7	31.67	17
Panel N	RT-qPCR	IL-6	CAU Male
			Ct	100	8.85	15	Paired t-test	Group	t=1.223, df=14, P=0.2416, two-tailed
			DD	123.6	9.06	19
Panel O	RT-qPCR	NFκB1	CAU Male
			Ct	100.0	8.13	19	Paired t-test	Group	t=3.284, df=17, P=0.0044, two-tailed
			DD	139.4	10.24	18
	Procedure	Measurement	Group	Mean	SEM	N = samples	Statistical test	Comparison	Values
Panel P	RT-qPCR	TNFα	CAU Female
			Ct	100.0	14.14	8	Wilcoxon matched-pairs signed rank test	Group	P=0.0234, two-tailed
			DD	245.7	50.74	9
Panel Q	RT-qPCR	IFNγ	CAU Female
			Ct	100.0	6.02	9	Paired t-test	Group	t=2.381, df=8, P=0.0445, two-tailed
			DD	145.9	16.09	9
Panel R	RT-qPCR	IL-2	CAU Female
			Ct	100.0	14.20	9	Wilcoxon matched-pairs signed rank test	Group	P=0.0117, two-tailed
			DD	184.6	26.23	9
Panel S	RT-qPCR	IL-6	CAU Female
			Ct	100.0	7.63	7	Paired t-test	Group	t=3.327, df=6, P=0.0159, two-tailed
			DD	134.3	8.76	9
Panel T	RT-qPCR	NFκB1	CAU Female
			Ct	100.0	12.42	9	Paired t-test	Group	t=4.082, df=8, P=0.0035, two-tailed
			DD	314.5	44.83	9

## Sheet: Supp Figure 3
	Procedure	Measurement	Group	Mean	SEM	N = samples	Statistical test	Comparison	Values
Panel A	RT-qPCR	Iba1	dlPFC Male
			Ct	100.0	6.84	18	Wilcoxon matched-pairs signed rank test	Group	P=0.0023, two-tailed
			DD	213.4	26.35	19
Panel B	RT-qPCR	GFAP	dlPFC Male
			Ct	100.0	5.66	19	Wilcoxon matched-pairs signed rank test	Group	P=0.0602, two-tailed
			DD	78.36	6.88	19
Panel C	RT-qPCR	HTR2A	dlPFC Male
			Ct	100.0	9.81	19	Wilcoxon matched-pairs signed rank test	Group	P=0.0003, two-tailed
			DD	154.8	12.54	19
	Procedure	Measurement	Group	Mean	SEM	N = samples	Statistical test	Comparison	Values
Panel D	RT-qPCR	Iba1	dlPFC Female
			Ct	100.0	10.39	9	Wilcoxon matched-pairs signed rank test	Group	P=0.0391, two-tailed
			DD	160.2	23.48	9
Panel E	RT-qPCR	GFAP	dlPFC Female
			Ct	100.0	9.31	9	Paired t-test	Group	t=1.982, df=8, P=0.0828, two-tailed
			DD	76.29	10.47	9
Panel F	RT-qPCR	HTR2A	dlPFC Female
			Ct	100.0	10.73	9	Paired t-test	Group	t=3.971, df=8, P=0.0041, two-tailed
			DD	178.8	12.96	9
	Procedure	Measurement	Group	Mean	SEM	N = samples	Statistical test	Comparison	Values
Panel G	RT-qPCR	Iba1	CAU Male
			Ct	100.0	7.99	18	Paired t-test	Group	t=3.246, df=17, P=0.0048, two-tailed
			DD	161.7	17.60	19
Panel H	RT-qPCR	GFAP	CAU Male
			Ct	100.0	9.97	18	Paired t-test	Group	t=2.253, df=17, P=0.0377, two-tailed
			DD	73.32	6.72	18
Panel I	RT-qPCR	HTR2A	CAU Male
			Ct	100.0	9.98	19	Paired t-test	Group	t=1.937, df=17, P=0.0696, two-tailed
			DD	128.6	11.76	18
	Procedure	Measurement	Group	Mean	SEM	N = samples	Statistical test	Comparison	Values
Panel J	RT-qPCR	Iba1	CAU Female
			Ct	100.0	12.14	9	Paired t-test	Group	t=2.339, df=8, P=0.0475, two-tailed
			DD	157.8	15.90	9
Panel K	RT-qPCR	GFAP	CAU Female
			Ct	100.0	14.42	9	Paired t-test	Group	t=1.971, df=8, P=0.0842, two-tailed
			DD	134.2	9.24	9
Panel L	RT-qPCR	HTR2A	CAU Female
			Ct	100.0	19.68	9	Paired t-test	Group	t=6.757, df=8, P=0.0001, two-tailed
			DD	309.1	32.03	9

## Sheet: Supp Figure 4
	Procedure	Measurement	Group	Mean	SEM	N = samples	Statistical test	Comparison	Values	Dunnett's T3 multiple comparisons tests	P value of the post hoc
Panel A	Open Field Test	Total distance moved (cm)
			AAV-EV	6150	318.8	6	Ordinary One-Way ANOVA	Group	F(2,15)=1.258, P=0.3125	AAV-EV vs. AAV-α-Syn 4W	0.3430
			AAV-α-Syn 4W	5536	257.2	6				AAV-EV vs. AAV-α-Syn 8W	0.4241
			AAV-α-Syn 8W	5604	324.3	6				AAV-α-Syn 4W vs. AAV-α-Syn 8W	0.9858
Panel B	Open Field Test	Mean speed (cm/s)
			AAV-EV	6833	0.3495	6	Ordinary One-Way ANOVA	Group	F(2,15)=2.097, P=0.1574	AAV-EV vs. AAV-α-Syn 4W	0.8158
			AAV-α-Syn 4W	6550	0.3816	6				AAV-EV vs. AAV-α-Syn 8W	0.3725
			AAV-α-Syn 8W	7475	0.2314	6				AAV-α-Syn 4W vs. AAV-α-Syn 8W	0.1468
Panel C	Open Field Test	Fast movement (s)
			AAV-EV	122.0	8903	6	Ordinary One-Way ANOVA	Group	F(2,15)=1.255, P=0.3133	AAV-EV vs. AAV-α-Syn 4W	0.4239
			AAV-α-Syn 4W	104.3	10.17	6				AAV-EV vs. AAV-α-Syn 8W	0.9864
			AAV-α-Syn 8W	124.2	10.01	6				AAV-α-Syn 4W vs. AAV-α-Syn 8W	0.3445
Panel D	Open Field Test	Slow movement (s)
			AAV-EV	285.5	34.18	6	Ordinary One-Way ANOVA	Group	F(2,15)=0.4638, P=0.6376	AAV-EV vs. AAV-α-Syn 4W	0.9863
			AAV-α-Syn 4W	278.2	41.83	6				AAV-EV vs. AAV-α-Syn 8W	0.6474
			AAV-α-Syn 8W	243.7	17.59	6				AAV-α-Syn 4W vs. AAV-α-Syn 8W	0.7419
